# Supplementary material for: Global component analysis of errors in five satellite-only global precipitation estimates
Source: Copernicus journal article supplement (doi:10.5194/hess-2020-294), 2020-09-25
Supplement: Supplementary file 1 [file hess-2020-294-supplement.pdf]

**Table S1** Summary of the total bias and its three independent components for five evaluated satellite-only global precipitation estimates in main areas of the global land areas.<sup>a</sup>

| Products    | Season | COUNS                                                                            | Mexico                                   | Brazil                                                                               | Europe                                          | India                                    | China                                             | Australia                                |
|-------------|--------|----------------------------------------------------------------------------------|------------------------------------------|--------------------------------------------------------------------------------------|-------------------------------------------------|------------------------------------------|---------------------------------------------------|------------------------------------------|
| IMERG suite | MAM    | T: >100% in most areas of humid; MC: H                                           | T: > 100% in most regions; MC: H and F   | The mutual cancellations between M and F                                             | T: >100% in most regions; MC: H                 | T: > 100% in most regions; MC: H and F   | T: >100% in most areas of semi-humid; MC: F and M | The mutual cancellations between M and F |
|             | JJA    | T: >100% in areas other than humid areas; MC: H                                  | T: >100% in northwest; MC: H             | Similar to MAM season, except for the magnitude of T and H is higher than MAM season | MC: H; the mutual cancellations between M and F | The mutual cancellations between M and F | T: between $\pm 20\%$ ; MC: F and M               | The mutual cancellations between M and F |
|             | SON    | T: between $\pm 60\%$ ; MC: H                                                    | The mutual cancellations between M and F | The mutual cancellations between M and F                                             | The mutual cancellations between M and F        | The mutual cancellations between M and F | T: between $\pm 40\%$ ; MC: F and M               | The mutual cancellations between M and F |
|             | DJF    | T: > 100% in humid areas and less than - 60% in arid and semi-arid areas; MC: H, | T: >100% in south; MC: F and H           | the mutual cancellations between M and F                                             | T: >80% in most areas; MC: H                    | T: >100% in most areas; MC: H and F      | MC: underestimation (overestimation): M (F)       | The mutual cancellations between M and F |

|                  |     |                                                 |                                                   |                                                                                                        |                                                             |                                                   |                                                                                                                       |                                                   |
|------------------|-----|-------------------------------------------------|---------------------------------------------------|--------------------------------------------------------------------------------------------------------|-------------------------------------------------------------|---------------------------------------------------|-----------------------------------------------------------------------------------------------------------------------|---------------------------------------------------|
|                  |     | F and M,<br>respectively                        |                                                   |                                                                                                        |                                                             |                                                   |                                                                                                                       |                                                   |
| GSMaP<br>suite   | MAM | T: >100% in<br>most areas of<br>humid;<br>MC: H | T: > 100% in<br>most regions;<br>MC: H and F      | The mutual<br>cancellations<br>between M<br>and F                                                      | T: >80% in<br>most regions;<br>MC: H                        | T: >100% in<br>most regions;<br>MC: H and F       | T: > 100% in most<br>areas of semi-<br>humid; MC: F and<br>M                                                          | The mutual<br>cancellations<br>between M<br>and F |
|                  | JJA | T: >100% in<br>most areas;<br>MC: H and F       | T: > 100% in<br>northwest;<br>MC: H               | Similar to<br>MAM season,<br>except for the<br>magnitude of<br>T and H is<br>higher than<br>MAM season | MC: H; the<br>mutual<br>cancellations<br>between M<br>and F | The mutual<br>cancellations<br>between M<br>and F | T: between $\pm 20\%$ ;<br>MC: F and M                                                                                | The mutual<br>cancellations<br>between M<br>and F |
|                  | SON | T: >60% in<br>most areas;<br>MC: H              | The mutual<br>cancellations<br>between M<br>and F | The mutual<br>cancellations<br>between M<br>and F                                                      | T: >60% in<br>most areas;<br>MC: H                          | The mutual<br>cancellations<br>between M<br>and F | T: between -40%<br>and -60% in south,<br>and >100% in<br>most areas other<br>than south; MC: M<br>and F, respectively | The mutual<br>cancellations<br>between M<br>and F |
|                  | DJF | T: > 80% in<br>southeast;<br>MC: H              | T: > 100% in<br>most areas;<br>MC: H              | The mutual<br>cancellations<br>between M<br>and F                                                      | T: between -<br>40% and -<br>60% in most<br>areas; MC: M    | The mutual<br>cancellations<br>between M<br>and F | T: > 80% in<br>midlands; MC: F                                                                                        | The mutual<br>cancellations<br>between M<br>and F |
| PERSIANN-<br>CCS | MAM | T: >100% in<br>most areas<br>other than         | T: >100%;<br>MC: F                                | T: >80% in<br>most regions;<br>MC: H and F                                                             | T: <40% in<br>most areas;<br>the mutual                     | T: >100% in<br>south; MC:<br>H and F              | T: >100% in areas<br>other than humid (<<br>-40%); MC: F and                                                          | The mutual<br>cancellations<br>between M          |

|  |     |                                                                                                     |                                          |                                           |                                          |                                          |                                                                         |                                          |
|--|-----|-----------------------------------------------------------------------------------------------------|------------------------------------------|-------------------------------------------|------------------------------------------|------------------------------------------|-------------------------------------------------------------------------|------------------------------------------|
|  |     | humid; MC: F and H                                                                                  |                                          |                                           | cancellations between M and F            |                                          | M (humid)                                                               | and F                                    |
|  | JJA | T: >100% in parts of midlands to west; MC: H and F                                                  | T: > 100% in northwest; MC: H and F      | T: >60% in most inland areas; MC: F       | The mutual cancellations between M and F | The mutual cancellations between M and F | The mutual cancellations between H and F                                | The mutual cancellations between M and F |
|  | SON | T: >100% in most areas of northeast and between -40 and -60 in southeast; MC: F and H, respectively | The mutual cancellations between M and F | T: >80% in most inland areas; MC: F and H | The mutual cancellations between M and F | The mutual cancellations between M and F | T: < -60% in humid; MC: M                                               | The mutual cancellations between M and F |
|  | DJF | T: >100% in areas other than humid; MC: F and H                                                     | T: >100%; MC: F                          | T: >80% in inland and east; MC: F and H   | T: >60% in most areas; MC: F             | T: > 80% in most areas; MC: F            | T: < -40% in most areas of humid and > 100% in other areas; MC: M and F | The mutual cancellations between M and F |

<sup>a</sup> Noation: T, H, M, and F represents the total bias, hit bias, miss bias, and false bias, respectively; MC indicates the major component of total bias.

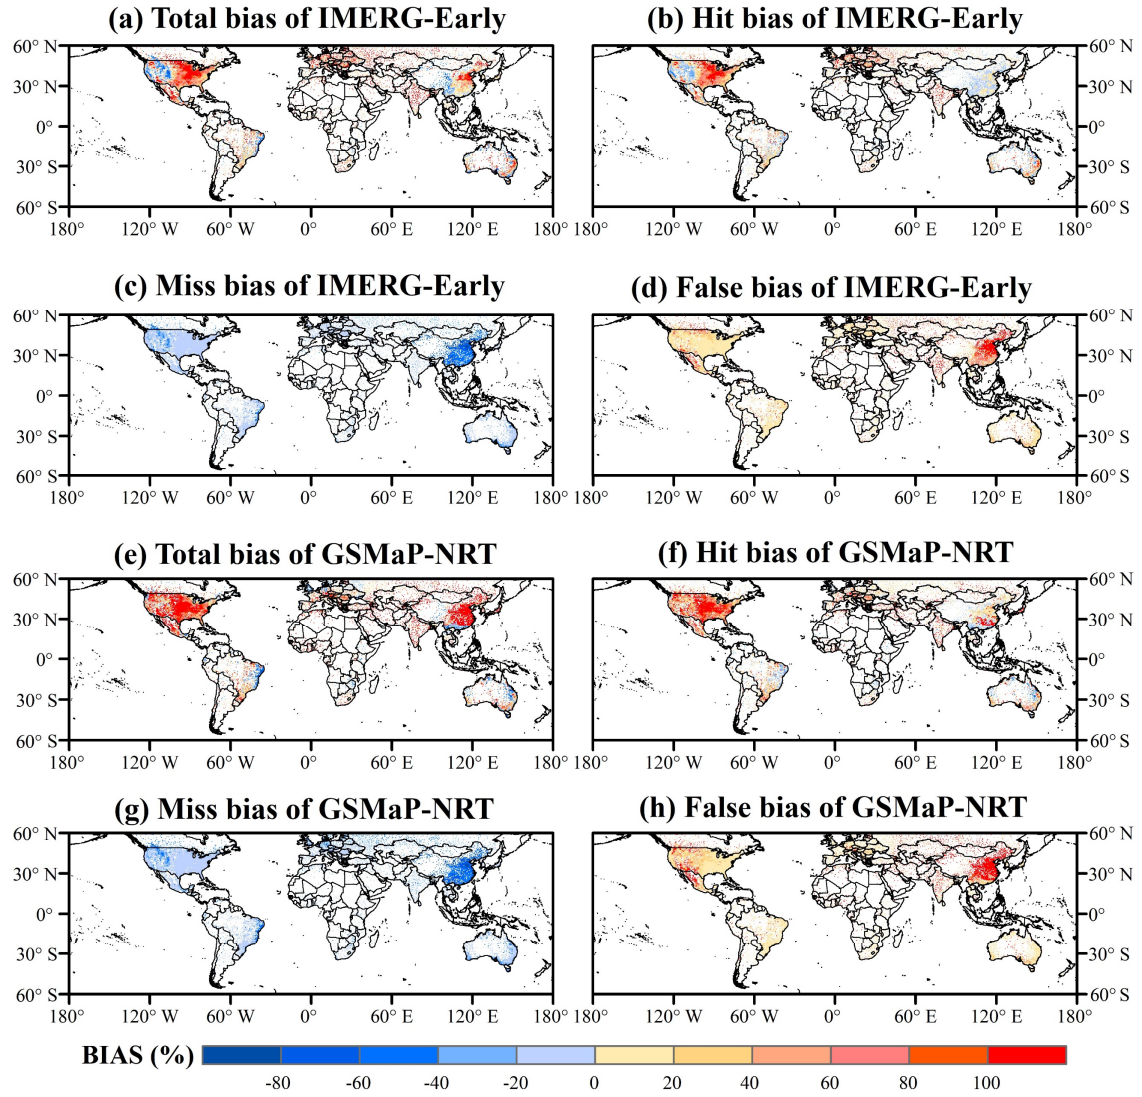

**Fig. S1.** Spatial distribution of the total bias and its three independent components for the two satellite-only global precipitation estimates (i.e., IMERG-Early, and GSMaP-NRT) at a  $0.5^\circ$  spatial and daily temporal resolution in the MAM season across global land for the period from 2015 to 2019 (5 years): (a-d) IMERG-Early, (e-h) GSMaP-NRT.



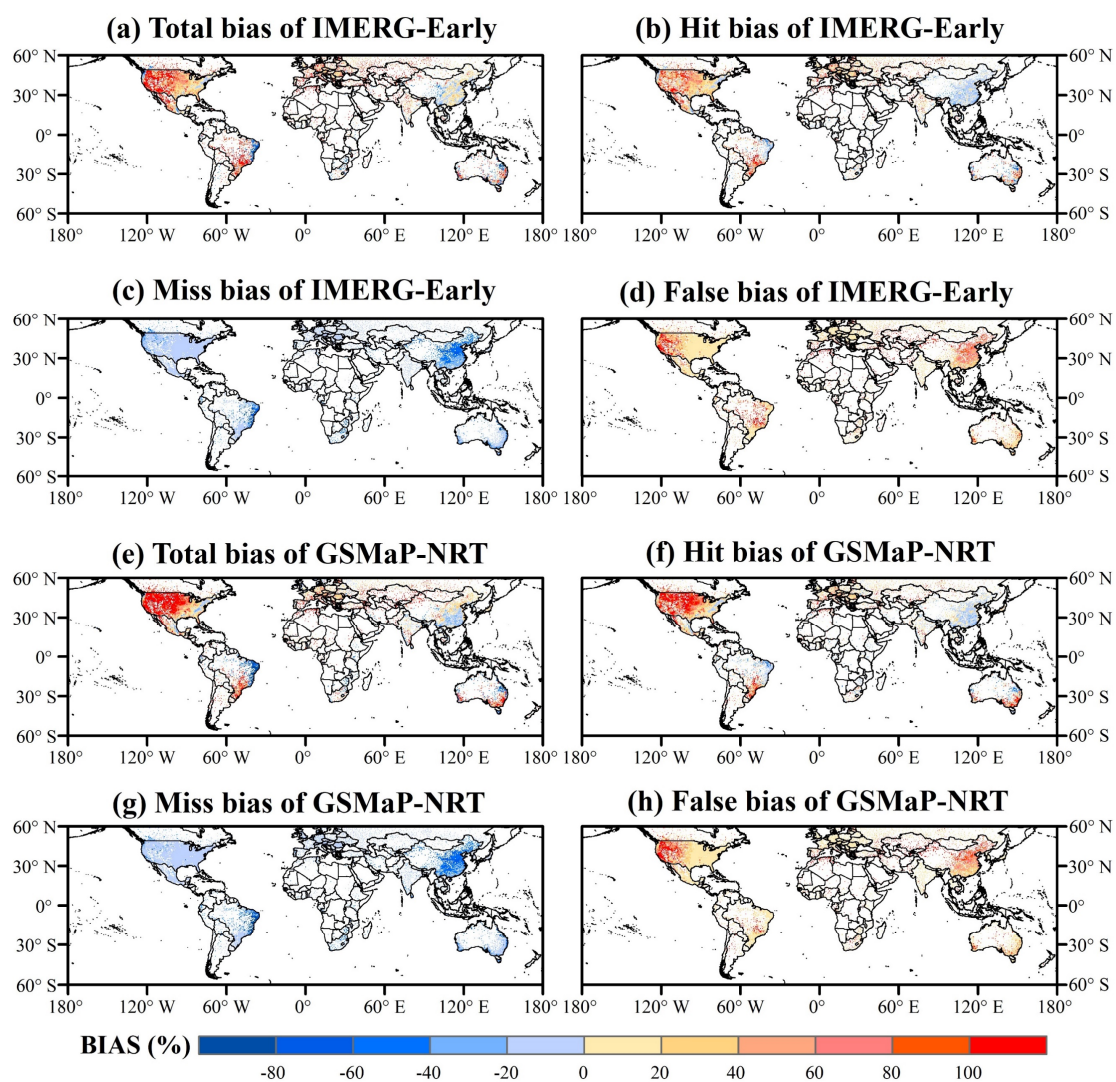

**Fig. S2.** As in Fig. S1 for JJA season.

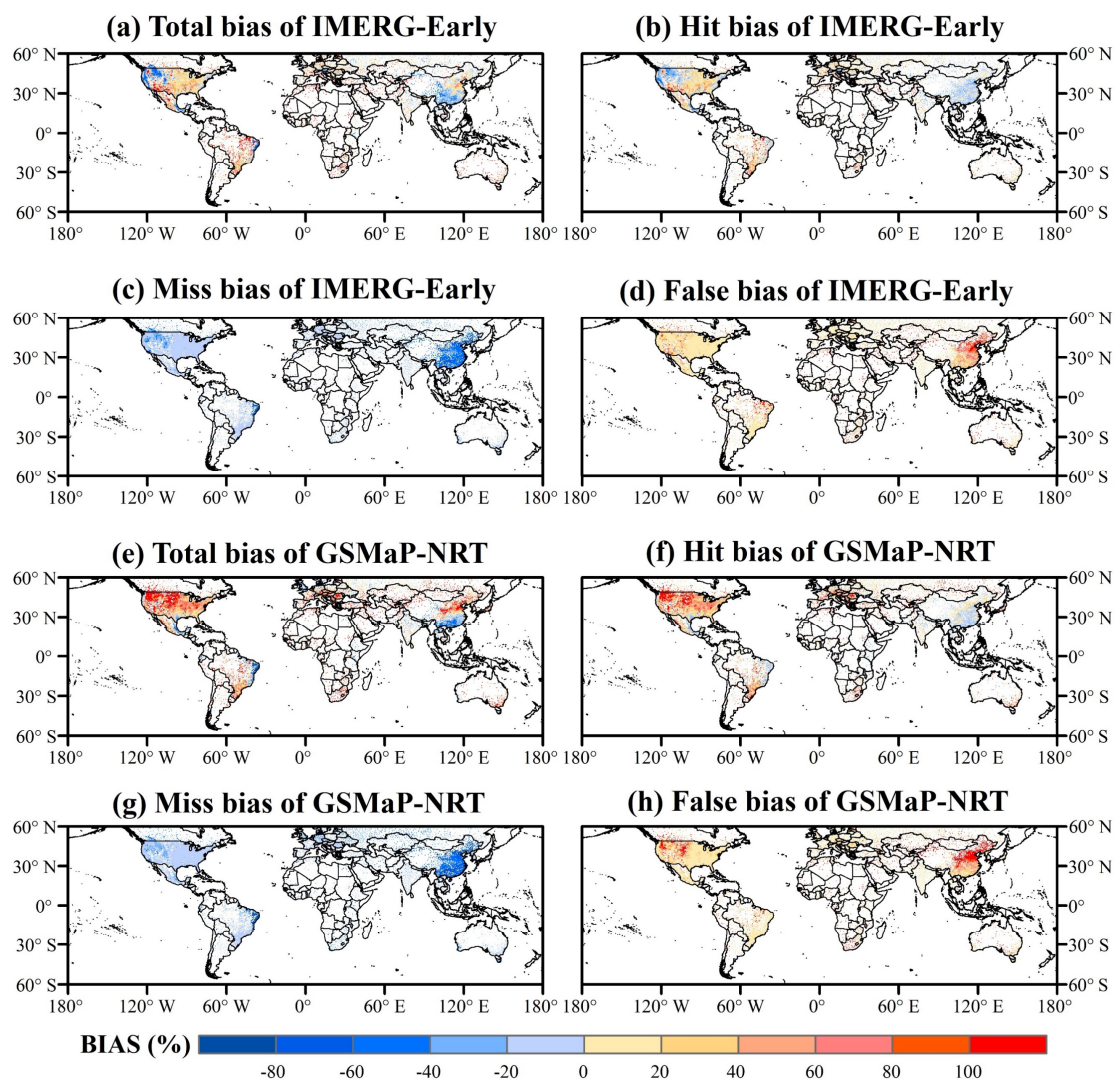

**Fig. S3.** As in Fig. S1 for SON season.

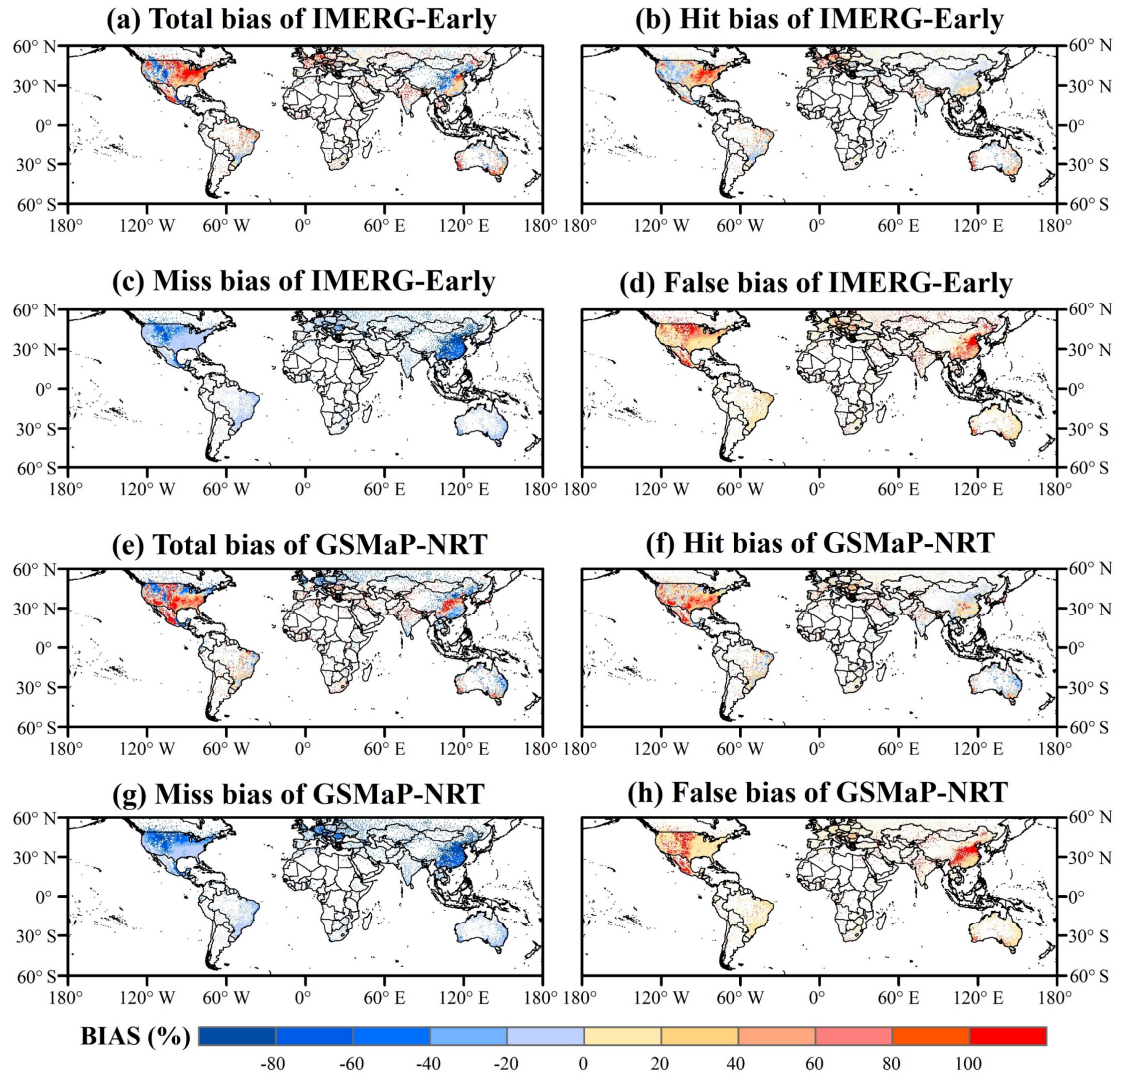

**Fig. S4.** As in Fig. S1 for DJF season.



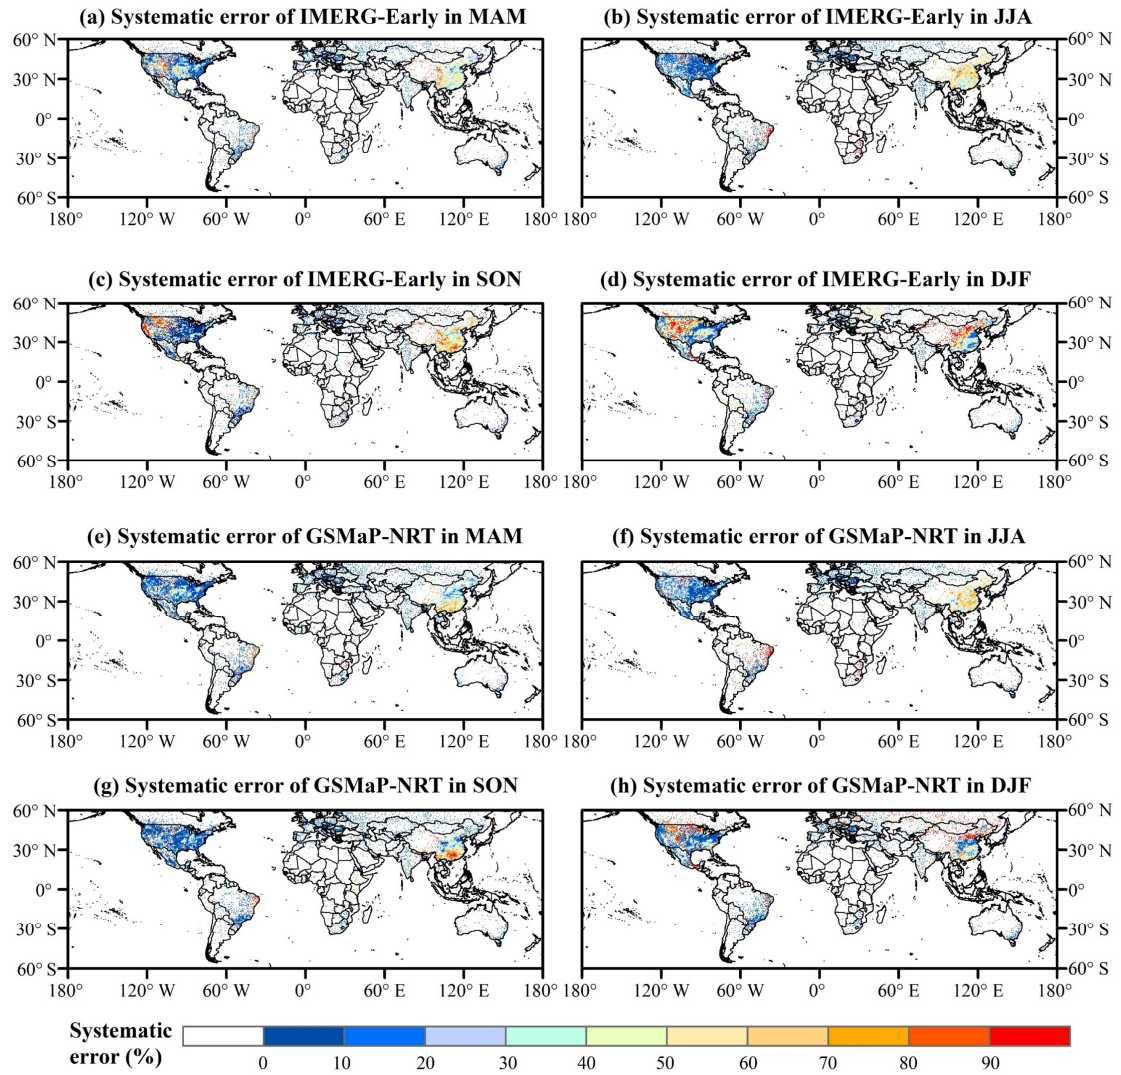

**Fig. S5.** Spatial distribution of systematic errors for the two satellite-only global precipitation estimates (i.e., IMERG-Early, and GSMaP-NRT) at a  $0.5^\circ$  spatial and daily temporal resolution in the four seasons (i.e., MAM, JJA, SON, and DJF) across global land for the period from 2015 to 2019 (5 years): (a-d) IMERG-Early, (e-h) GSMaP-NRT.
